# Supplementary material for: Assessing the Impact of Optimization Measures on Sustainable Water Resource Management in the Guanzhong Area, China
Source: Frontiers journal article supplement (doi:10.3389/fenvs.2021.805513), 2021-12-15
Supplement: Table_1.DOCX [file Table_1.DOCX]

**Appendixes**

Equations used in the model.

Table S1. The population sub-system

| Entity | Description(unit) | Equations |
| --- | --- | --- |
| TP | Total population (106 persons) | TP= INTEG (NPA, 21.6432) |
| NPA | Net population added (106persons) | NPA=TP×GP× (1-1.5 × CWR/100) |
| UP | Urban population (106 persons) | UP=TP×PUR |
| RP | Rural population (106 persons) | RP=TP-UP |
| PUR | Population urbanization rate (%) | PUR= WITH LOOKUP (Time, ([(2001,28)-(2014,52)],(2002,29),(2003,29),(2004,29),(2005,29),(2006,31), (2007,33), (2008,35), (2009,38), (2010,40) , (2011,43), (2012,46), (2013,49))) |
| GP | Growth rate of Population (‰) | GP= WITH LOOKUP (Time, ([(2001, 0)-(2014,0.012)],(2002,0.009),(2003,0.010),(2004,0.012),(2005,0.010),(2006,0.012), (2007,0.010), (2008,0.008), (2009,0.007), (2010,0.005), (2011,0.004), (2012,0.003), (2013,0.004))) |

Table S2. The economy sub-system

| Entity | Description(unit) | Equations |
| --- | --- | --- |
| GDP | Gross Domestic Product(109 yuan) | GDP= PIAV+ SIAV+ TIAV |
| PIAV | The primary industry added value(109 yuan) | PIAV =INTEG (PIA, 16.304) |
| SIAV | The secondary industry added value(109 yuan) | SIAV =INTEG (SIA, 59.810) |
| TIAV | The tertiary industry added value(109 yuan) | TIAV =INTEG (TIA, 59.736) |
| PIA | Primary industry AV added (109 yuan) | PIA= PIAV×GPI×(1-2.5 × CWR/100) |
| SIA | Secondary industry AV added (109 yuan) | SIA= SIAV×GSI×(1-2 × CWR/100) |
| TIA | Tertiary industry AV added (109 yuan) | TIA=TIAV×GTI×(1-1.5 × CWR/100) |
| GPI | Growth rate of primary industry AV(%) | GPI= WITH LOOKUP (Time,([(2000, 0)-(2014,0.3)],(2001,0.09),(2002,0.06),(2003,0.23),(2004,0.09),(2005,0.13),(2006,0.21),(2007,0.24),(2008,0.06),(2009,0.27),(2010,0.22),(2011,0.12),(2012,0.12),(2013,0.07))) |
| GSI | Growth rate of secondary industry AV(%) | GSI= WITH LOOKUP (Time, ([(2001, 0)-(2014,0.4)],(2002,0.19),(2003,0.17),(2004,0.21),(2005,0.14),(2006,0.21),(2007,0.31),(2008,0.18),(2009,0.24),(2010,0.23),(2011,0.21),(2012,0.19),(2013,0.10))) |
| GTI | Growth rate of tertiary industry AV(%) | GTI= WITH LOOKUP (Time, ([(2001, 0)-(2014,0.3)],(2002,0.12),(2003,0.17),(2004,0.24),(2005,0.13),(2006,0.16),(2007,0.21),(2008,0.27),(2009,0.16),(2010,0.20),(2011,0.21),(2012,0.15),(2013,0.12))) |
| PCG | Per capita GDP (yuan/person) | PCG=(GDP ×109)/ (TP×106) |

Table S3. The people’s livelihood sub-system

| Entity | Description(unit) | Equations |
| --- | --- | --- |
| PIU | Per capita disposable income of urban households (yuan) | PIU= INTEG (UIA, 4336) |
| PIR | Per capita net income of rural households (yuan) | PIR= INTEG (RIA, 1628) |
| UIA | Urban income added (yuan) | UIA=PIU×GIU×(1- CWR/100) |
| RIA | Rural income added (yuan) | RIA=PIR×GIR×(1- 1.5×CWR/100) |
| GIU | Growth rate of Per capita disposable income of urban households (%) | GIU= WITH LOOKUP (Time, ([(2001, 0)-(2014,0.3)],(2002,0.19),(2003,0.09),(2004,0.10),(2005,0.11),(2006,0.22,(2007,0.22),(2008,0.23),(2009,0.16),(2010,0.21),(2011,0.15),(2012,0.08),(2013,0.10))) |
| GIR | Growth rate of Per capita net income of rural households (%) | GIR= WITH LOOKUP (Time, ([(2001, 0)-(2014,0.3)],(2002,0.08),(2003,0.10),(2004,0.09),(2005,0.09),(2006,0.24),(2007,0.20),(2008,0.19),(2009,0.22),(2010,0.20),(2011,0.18),(2012,0.16),(2013,0.14))) |
| IGR | The income gap index between urban and rural area | IGR=PIU/PIR |

Table S4. The Land resources sub-system

| Entity | Description(unit) | Equations |
| --- | --- | --- |
| TCA | Total cultivated field area(103 ha) | TCA=INTEG (CA, 1609.86) |
| GY | [Grain yield](http://www.youdao.com/w/grain%20yield/#keyfrom=E2Ctranslation)(106 tons) | GY=INTEG (GI, 6.8038) |
| TSA | Total Sown Area  (103 ha) | TSA=INTEG (GI, 2242.44) |
| SAGC | Sown Area of grain crops(103 ha) | SAGC=INTEG (GI, 1719.3) |
| CA | Cultivated area added(103 ha) | CA=TCA×GCA×(1- 1.5 × CWR/100) |
| GI | Grain yield increase(106 ton) | GI=GY×GGY×(1- 1.5 × CWR/100) |
| SAI | Total Sown Area increase (103 ha) | SAI=TSA×SAC×(1- 3 × CWR/100) |
| AGCI | Sown Area of grain crops increase  (103 ha) | AGCI=TCA×GCA×(1- 2 × CWR/100) |
| GCA | Growth rate of cultivated area (%) | GCA=WITH LOOKUP (Time, ([(2001, -0.04)-(2014,0.002)],(2002,-0.02),(2003,0.002),(2004,-0.004),(2005,-0.009),(2006,0.004),(2007,-0.002),(2008,-0.001),(2009,-0.002),(2010,-0.002),(2011,-0.003),(2012,-0.005),(2013,-0.008))) |
| GGY | Growth rate of [grain yield](http://www.youdao.com/w/grain%20yield/#keyfrom=E2Ctranslation) (%) | GGY=WITH LOOKUP (Time, ([(2001, -0.3)-(2014,0.3)],(2002,-0.022), (2003,0.11), (2004,0.01),(2005,0.06),(2006,0.15),(2007,0.20),(2008,0.03),(2009,0.05),(2010,-0.12),(2011,-0.04), (2012,-0.01),(2013,-0.01))) |
| SAC | Change in total sown area(%) | SAC=WITH LOOKUP (Time, ([(2001, -0.06)-(2014,0.03)],(2002,-0.013), (2003,0.018), (2004,0.018), (2005,0.005),(2006,-0.052), (2007,0.025),(2008,0.024),(2009,0.006),(2010,-0.06),(2011,-0.008),(2012,-0.002),(2013,0.004))) |
| AGCC | Change in Sown Area of grain crops (%) | GGY=WITH LOOKUP (Time, ([(2001, -0.2)-(2014,0.2)],(2002,-0.041), (2003,0.001), (2004,0.032),(2005,-0.006),(2006,-0.066), (2007,0.031),(2008,0.021),(2009,0.009),(2010,-0.08),(2011,-0.001),(2012,-0.003),(2013,-0.008))) |
| PUA | Per unit area of grain production (kg/ha) | PUA=(GY×109)/(TCA×103) |
| MCI | Multiple-crop index(%) | MCI=TSA/TCA×100% |
| GCSI | Ratio of total sown area and sown area of grain crops (%) | GCSI=SAGC/TSA |
| FSR | Food self - sufficiency rate (%) | FSR=FP/FC |
| FP | Food production (tons) | FP=GY×106 |
| PFC | Per capita food consumption (tons) | 0.395 |
| FC | Food consumption (tons) | FC=PFC×TP×106 |

Table S5. The water supply and demand sub-system

| Entity | Description(unit) | Equations |
| --- | --- | --- |
| TWD | Total water demand (109m3) | TWD=AWD+WDS+WDT+DWD+EWD |
| AWD | Agricultural water demand (109m3) | AWD=IWF+FWC |
| WDS | Water demand of secondary industry (109m3) | WDS=SIU×RIW |
| WDT | Water demand of tertiary industry (109m3) | WDT=TIAV×WTV |
| DWD | Domestic water demand (109m3) | DWD=WDU+WDR+AWU |
| EWD | Ecological water demand (109m3) | EWD=(UEW+EOW)/10 |
| IWF | Irrigation water for farmland (109m3) | IWF=TCA×WPA |
| FWC | Water Consumption of Forest and Fishery (109m3) | FWC=WITH LOOKUP (Time, ([(2001,0.4)-(2014,0.5)],(2002,0.4),(2004,0.4),(2006,0.4),(2008,0.4),(2010,0.5),(2013,0.5))) |
| SIU | Secondary Industrial water use (109m3) | SIU=SIAV×WSV |
| RIW | Rate of industrial water repeating use(%) | RIW=WITH LOOKUP (Time, ([(2001,0)-(2014,1)],(2002,0.832),(2003,0.826),(2004,0.822),(2005,0.823),(2006,0.826),(2007,0.835),(2008,0.862),(2009,0.864),(2010,0.867),(2011,0.869),(2012,0.872),(2013,0.874))) |
| WDU | Water demand of urban households(109m3) | WDU=UP×PUW×T/106 |
| WDR | Water demand of rural households(109m3) | WDR= RP×PRW×T/106 |
| AWU | Animal water use (109m3) | AWU=LWD+SWD |
| LWD | Large livestock water demand(109m3) | LWD=LS×PLW× T/106 |
| SWD | Small livestock water demand(109m3) | SWD=SS×PSW×T/106 |
| LS | Large livestock stock(106 head) | LS= INTEG (IL, 1.4938) |
| SS | Small livestock stock(106 head) | SS= INTEG (IS, 7.5658) |
| IL | Increase in large livestock (106 head) | IL=LS×GLS×(1- 2×CWR/100) |
| IS | Increase in small livestock (106 head) | IS=SS×GSS×(1- 2×CWR/100) |
| WPA | Water use per cultivated area  (m3mu-1) | WPA= WITH LOOKUP (Time, ([(2001,100)-(2014,200)],(2001,110),(2006,122),(2010,116),(2013,118))) |
| WSV | Water use per unit of secondary industrial AV (m310-4yuan) | WSV=WITH LOOKUP (Time, ([(2001,0)-(2014,150)],(2002,148),(2005,88) (2008,44),(20010,26),(2013,20))) |
| WTV | Water use per unit of tertiary industry AV (m310-4yuan) | WTV=WITH LOOKUP (Time, ([(2001,0)-(2014,20)], (2002,14),(2005,12) (2008,9),(20010,5),(2013,4))) |
| PUW | Per capita urban water use per day(L) | PUW=WITH LOOKUP (Time, ([(2001,100)-(2014,200)],(2002,188),(2003,160),(2004,146),(2005,143),(2006,124),(2007,134),(2008,141),(2013,136))) |
| PRW | Water demand per capita rural population per day(L) | PRW=WITH LOOKUP (Time, ([(2001,0)-(2014,100)],(2002,65),(2003,66),(2004,67),(2005,68),(2006,69),(2007,70),(2008,71),(2013,76))) |
| GLS | Growth rate of large livestock(%) | GLS=WITH LOOKUP (Time,([(2001,-0.5)-(2014,0.5)],(2002,0.09),(2003,-0.10),(2004,0.24),(2005,0.02),(2006,-0.49),(2007,0.09),(2008,0.28),(2009,13),(2010,-0.06),(2011,0.02),(2012,-0.01),(2013,0.04))) |
| GSS | Growth rate of small livestock(%) | GSS=WITH LOOKUP (Time, ([(2001,-0.3)-(2014,0.3)],(2002,0.06),(2003,0.05),(2004,0.01),(2005,0.05),(2006,-0.26),(2007,0.15),(2008,0.17),(2009,0.10),(2010,0.06),(2011,0.04),(2012,0.05),(2013,-0.02))) |
| PLW | Per capita large livestock water use per day (L) | PLW=WITH LOOKUP (Time, ([(2001,0)-(2060,60)],(2002,30),(2004,31),(20032),(2013,33),(2030,40),(2060,60))) |
| PSW | Per capita small livestock water use per day (L) | PSW=WITH LOOKUP (Time,([(2000,10)-(2030,20)],(2002,21),(20013,26),(2030,35),(2030,50))) |
| T | Time | T= IF THEN ELSE (MODULO (Time, 4) = 0, 366, 365) |
| TAW | Total available water resources (109m3) | TAW=MAI+SPW+OWS-WTO-EF |
| SPW | Annual mean self-produced water (109m3) | SPW=SW+GW-WO |
| SW | Surface water resources (109m3) | SW=6.0392 |
| GW | Ground water resources (109m3) | GW=4.7701 |
| WO | Overlap of ground and surface water (109m3) | WO=3.5532 |
| WTO | Water transferred from outside (109m3) | WTO=0.4839 |
| OW | Other water resources (109m3) | OWS=IWT+RU+KW+TRW |
| IWT | Interbasin water transfer (109m3) | IWT=WITH LOOKUP (Time,([(2001,0)-(2060,30)],(2002,0),(2010,1.43),(2019,1.43),(2020,12.05),(2029,12.05),(2030,27.5),(2060,27.5))) |
| RU | Rainwater use (109m3) | RU=0.11 |
| KW | Karst water (109m3) | KW=0.13 |
| WB | Water balance (109m3) | WB=TAW-TWD |
| CWR | Coefficients of Water resources restrictions | CWR= IF THEN ELSE(Water balance <0, ABS(WB) , 0 ) |

Table S6. The circulating water sub-system

| Entity | Description(unit) | Equations |
| --- | --- | --- |
| TRW | Total recycling water (109m3) | TRW=RWA+RWI+WTP |
| RWA | Returning water from agriculture (109m3) | RWA=AWD×(1-AWC) |
| RWI | Recycling water from Industry (109m3) | RWI=IWD×CSI |
| WTP | Wastewater in treatment plant (109tons) | WTP=UDW+IW |
| UDW | Urban domestic wastewater discharge (109tons) | UDW=DWD×(1-UWC) |
| IWP | Industry wastewater discharge into wastewater treatment plant (109tons) | IWP=SIU×CPI |
| IWR | Industry wastewater discharge to river (109tons) | IWR=SIU×CRI |
| AWC | Agriculture water consumption coefficient | AWC=0.65 |
| UWC | Urban domestics water consumption coefficient | UWC=0.55 |
| WPR | Wastewater plant treatment rate(%) | WPR=0.65 |
| CPI | Coefficients of industrial wastewater discharged into treatment plan | CPI =WITH LOOKUP (Time, ([(1999,0) -(2014,0.1)],(2001,0.003),(2002,0.004),(2003, 0.003),(2005,0.008), (2006, 0.009))) |
| CRI | Coefficient of industrial wastewater discharged into river | CRI= WITH LOOKUP(Time, ([(2001,0.06) - (2008, 1)], (2001,0.06), (2004, 0.07), (2006, 0.08), (2008, 0.08))) |
| CSI | Coefficient of WRI meeting to the discharge standard | CSI= WITH LOOKUP(Time, ([(1999,0)-(2014,1)],(1999,0.62) ,(2001,0.80), (2002, 0.84), (2003,0.88), (2004, 0.93), (2005,0.94), (2006, 0.89), (2013, 0.90))) |

Table S7. The eco-environment sub-system

| Entity | Description(unit) | Equations |
| --- | --- | --- |
| UGA | Urban green area (ha) | UGA= INTEG (AG, 11409) |
| AG | Urban green area added (ha) | AG=GUA×GUA×(1-1.5×CWR/100) |
| UEW | Urban ecological water demand (108m3) | UEW=WGA+WUA |
| WGA | Water demand of green area (108m3) | WGA=UGA×WQ4/108 |
| WUA | Water demand of urban water surface area (108m3) | WUA=UWA×(EUW-MP)/107 |
| EOW | [Ecological water demand](http://dict.cn/ecological%20water%20demand)  (108m3) | EOW=WC+WP+WA |
| WC | Water for water and soil conservation (108m3) | WC=WSC×WQ1/104 |
| WA | Water demand of Artificial water area (108m3) | WA=AWA×WQ2/104 |
| WP | Water demand of plant (108m3) | WP=ZVA×WQ3/104 |
| UWA | Urban water surface area (ha) | UWA=6700 |
| EUW | Evaporation of urban water surface (mm a-1) | EUW=854.3 |
| MP | Mean precipitation (mm a-1) | MP=550.05 |
| ZVA | Zonal vegetation area (104ha) | ZVA=59.83 |
| WSC | Water and soil conservation area (104ha) | WSC=61.31 |
| AWA | Artificial water area (104ha) | AWA=0.52 |
| EF | [Environment flow](http://dict.cn/environment%20flow) (109m3) | EF=BEF; EFD; EFS |
| BEF | Base ecological flow(109m3) | BEF=1.600 |
| EFD | Instream flow for pollution dilution(109m3) | EFD=2.930 |
| EFS | Instream flow for sediment transport(109m3) | EFS=6.089 |
| WQ1,2,3,4 | Water quartos for WC,WGA,WP, and WA, respectively(m3ha-1) | WQ1=160,WQ2=304.25,  WQ3=150,WQ4=2600 |
| GUA | Growth rate of urban green area(%) | GUA= WITH LOOKUP (Time, ([(2001,0) - (2014, 0.4)], (2002,0.08), (2003, 0.03), (2004,0.04), (2005, 0.34), (2006,0.07), (2007, 0.02), (2008, 0.04), (2009,0.12), (2010, 0.08), (2011,0.12), (2012,0.14), (2013, 0.15))) |
